# Supplementary material for: Susceptibility rhythm to bacterial endotoxin in myeloid clock-knockout mice
Source: eLife journal article supplement (doi:10.7554/elife.62469), 2021-10-18

**A**

LysM-Cre

Clock-flox

myClock-KO

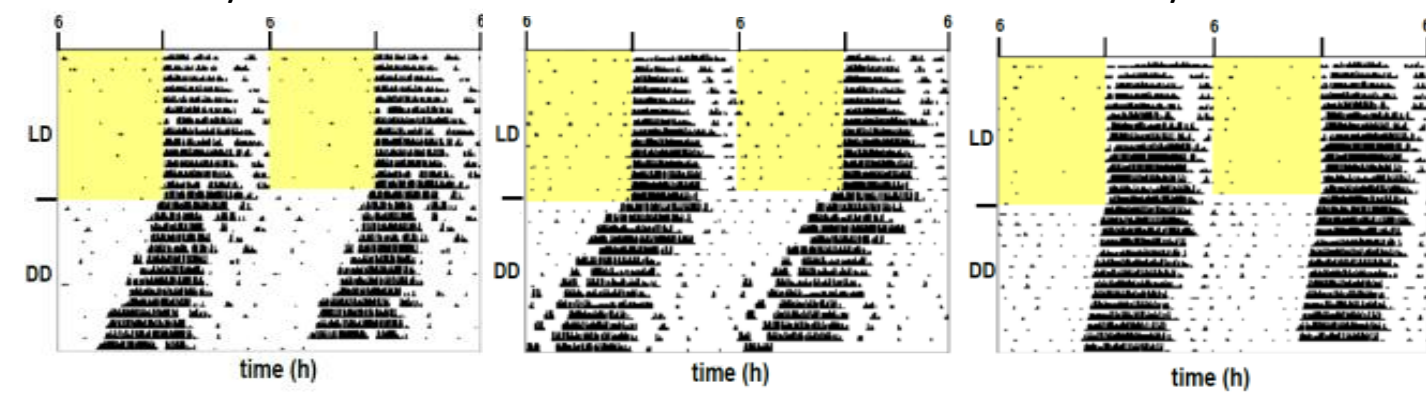**B**

average activity (counts/min)

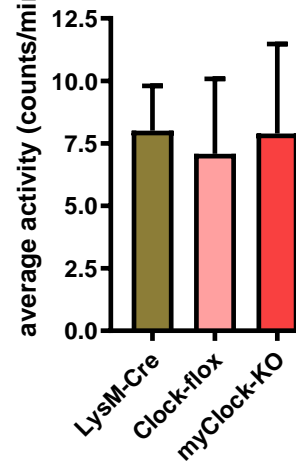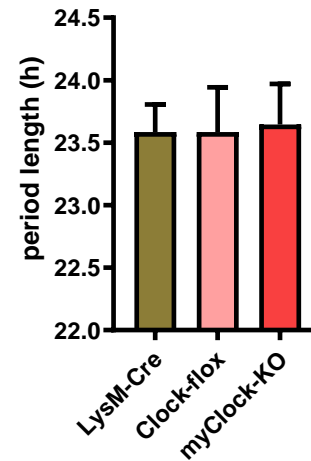**C**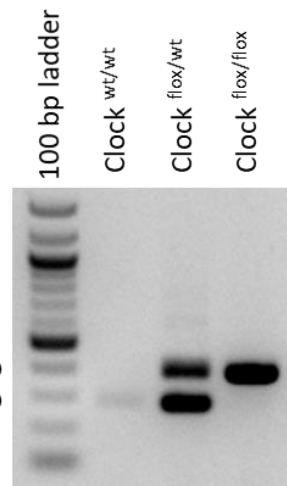**D***Dbp**Cry2**Per2*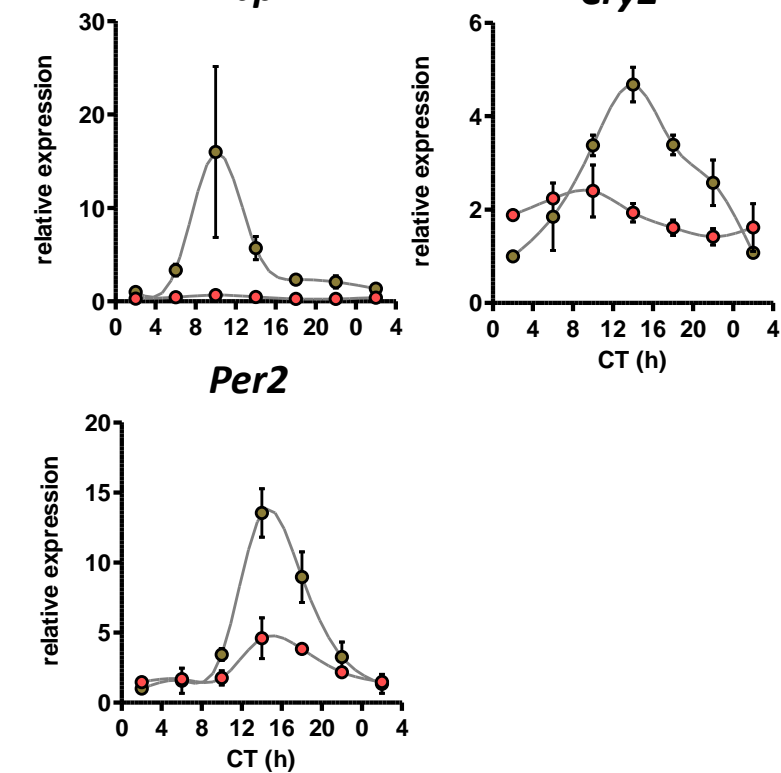**E**

rel. amplitude

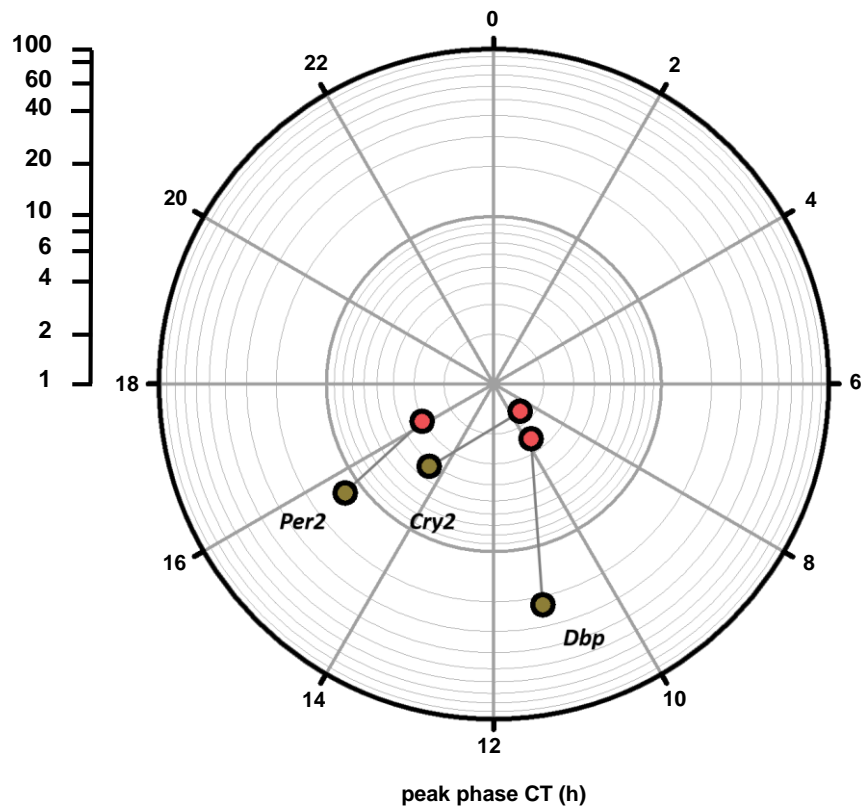**F**

Probability of Survival (%)

ToD after LPS (h)

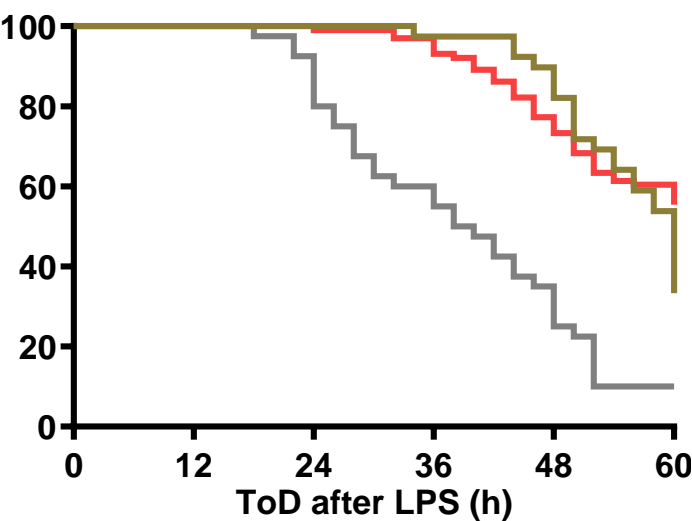

Supplement: supp [file elife-62469-supp-v1.zip]
