# Supplementary figures and images for: Susceptibility rhythm to bacterial endotoxin in myeloid clock-knockout mice
Source: eLife journal article supplement (doi:10.7554/elife.62469), 2021-10-18

# Blood

# Peritoneal cavity

# Thymus

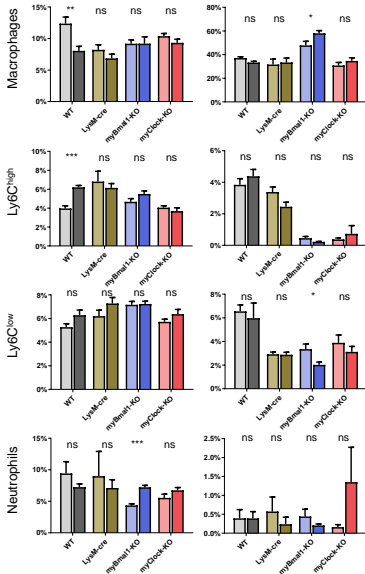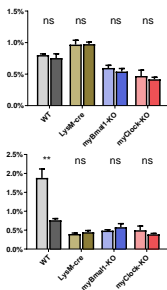

Supplement: supp [file elife-62469-supp-v1.zip]

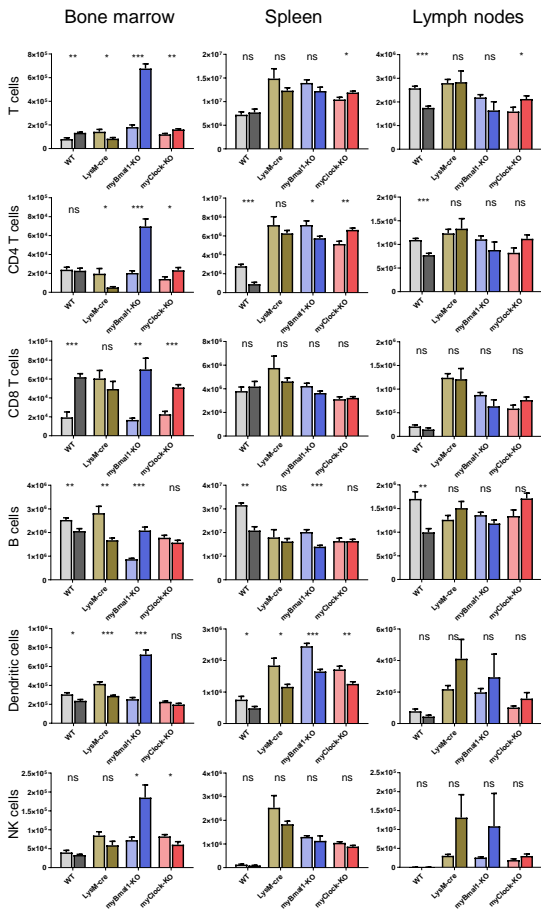

Supplement: supp [file elife-62469-supp-v1.zip]

**A**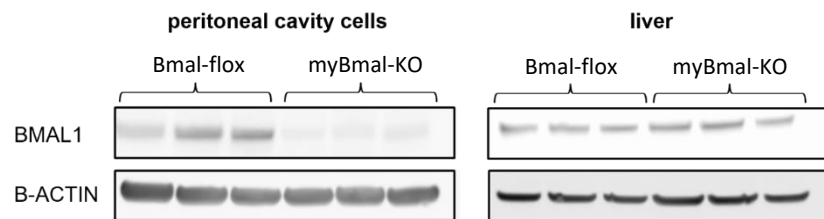**B**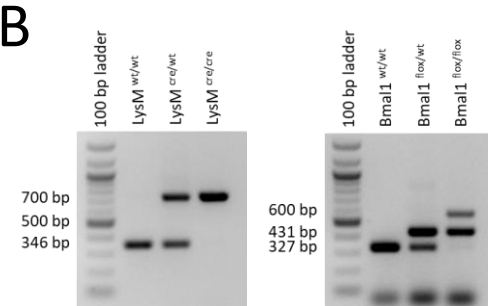**C**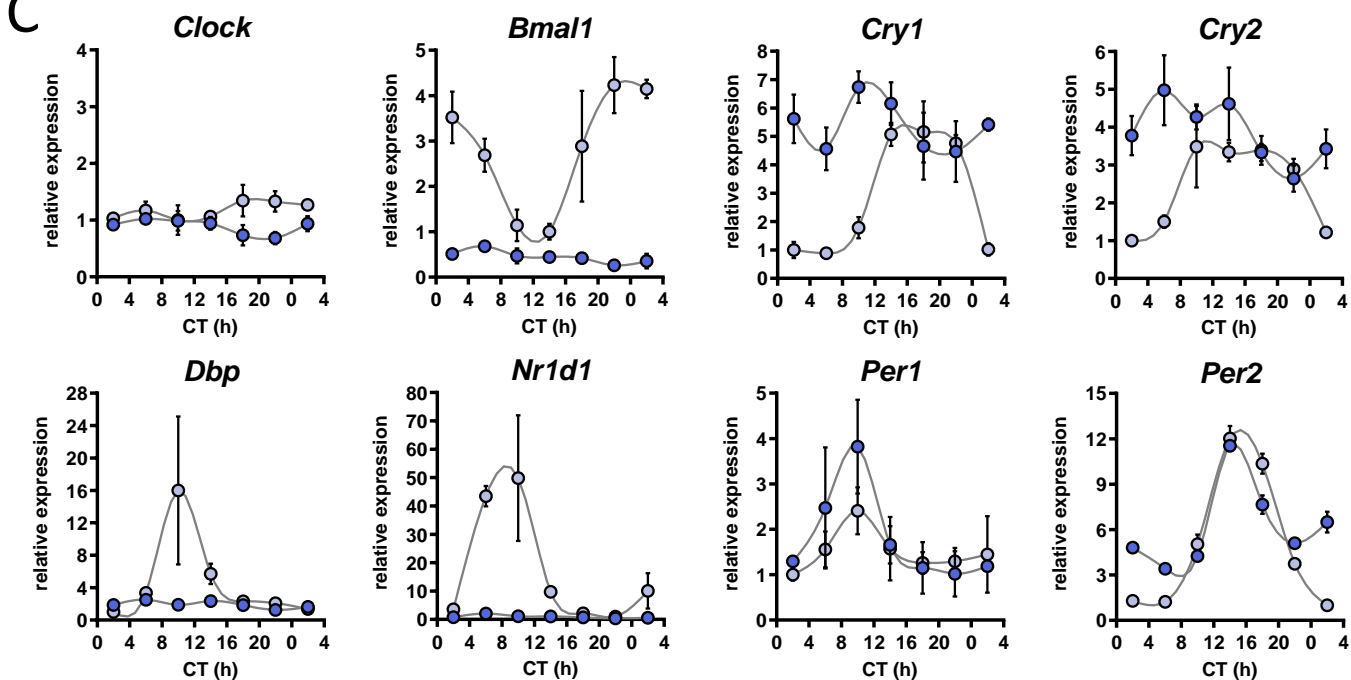**D**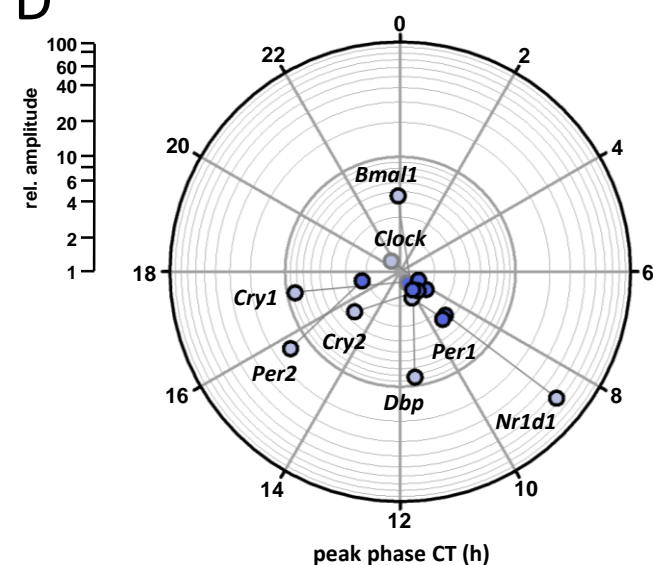**E**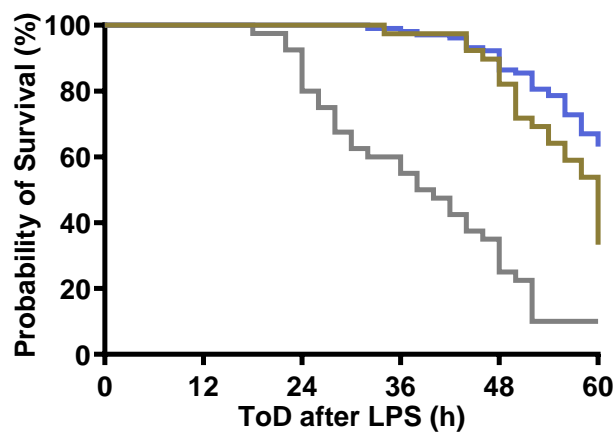

Supplement: supp [file elife-62469-supp-v1.zip]

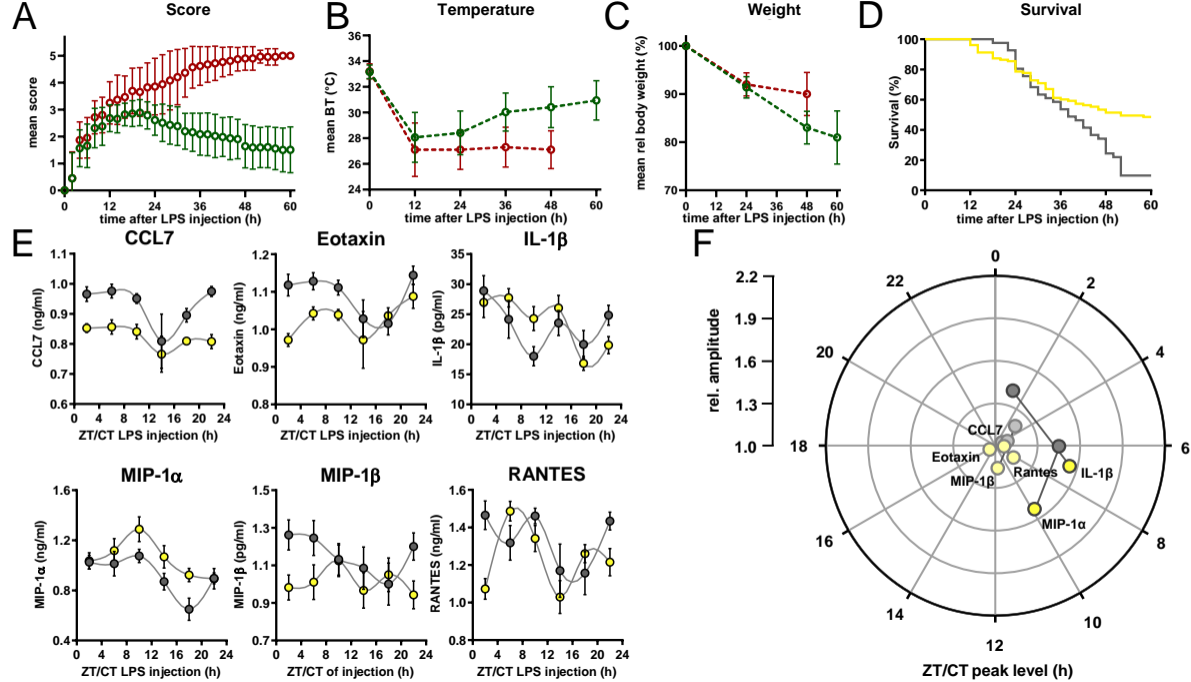

Supplement: supp [file elife-62469-supp-v1.zip]

# Blood

# Peritoneal cavity

# Thymus

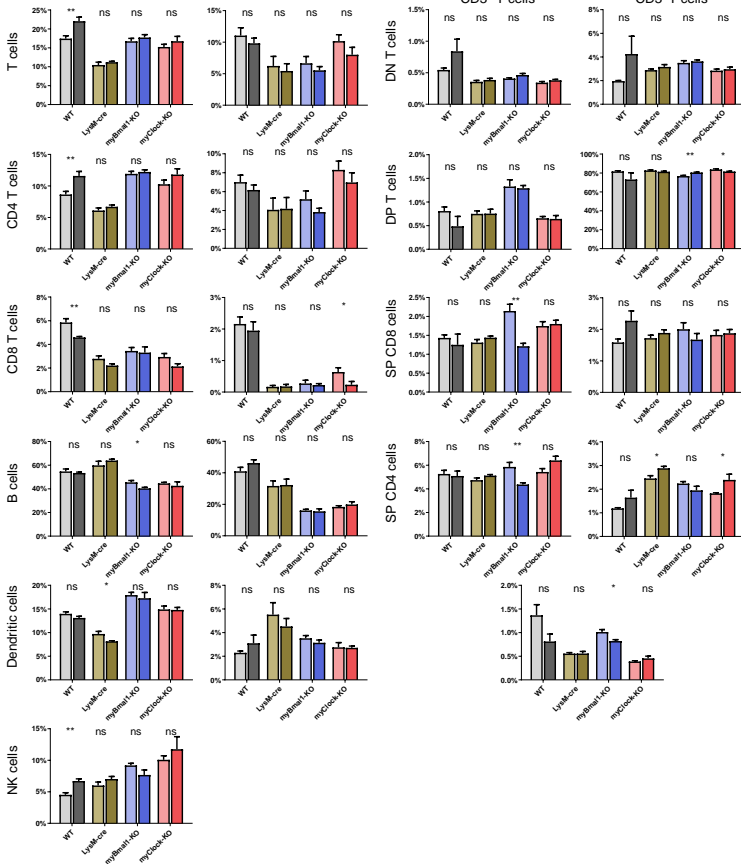

Supplement: supp [file elife-62469-supp-v1.zip]

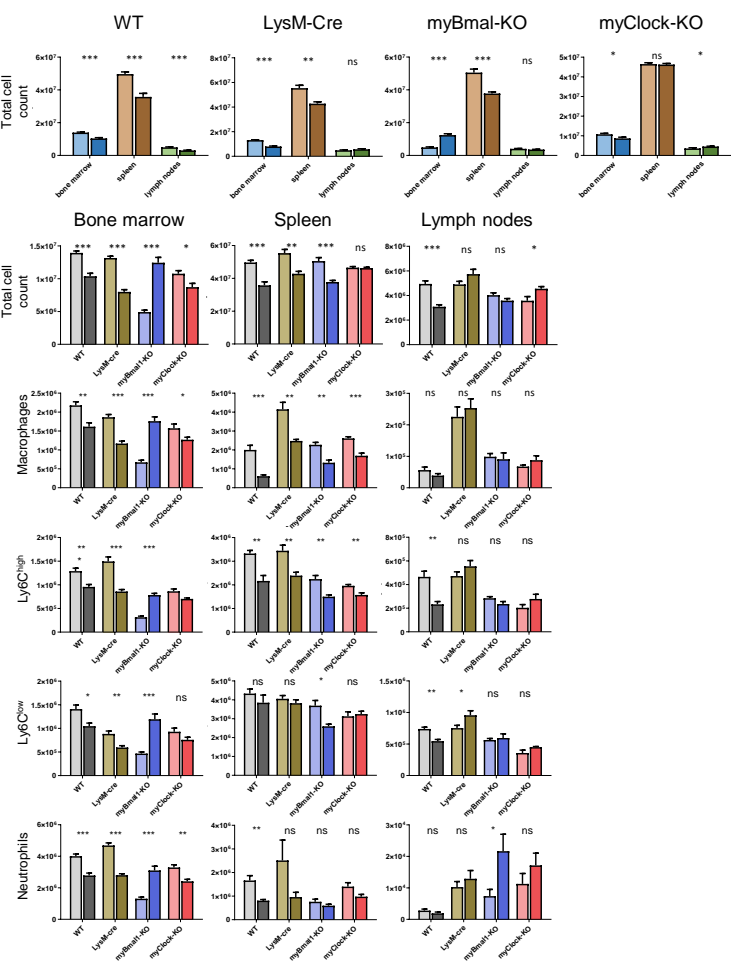

Supplement: supp [file elife-62469-supp-v1.zip]

**A**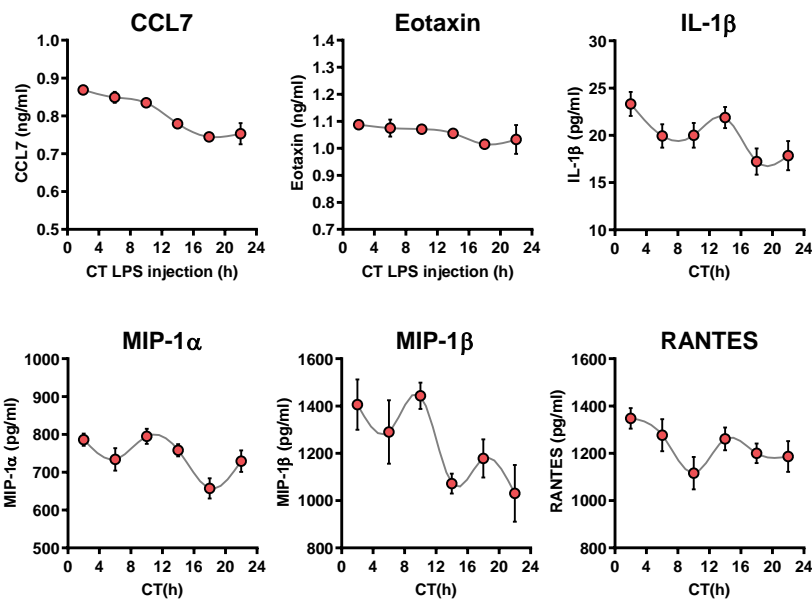**B**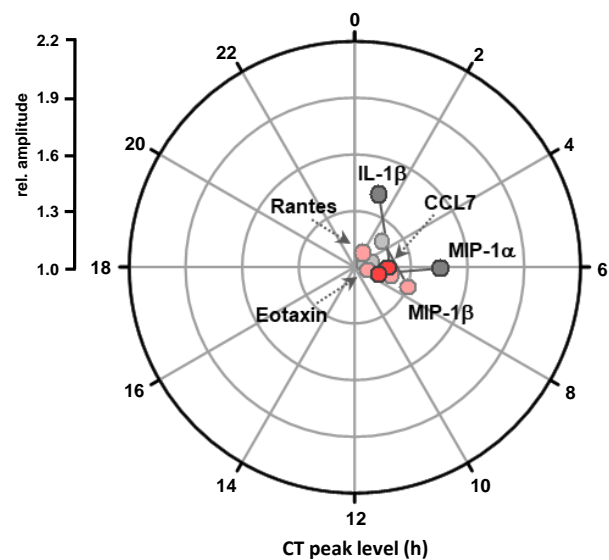**C**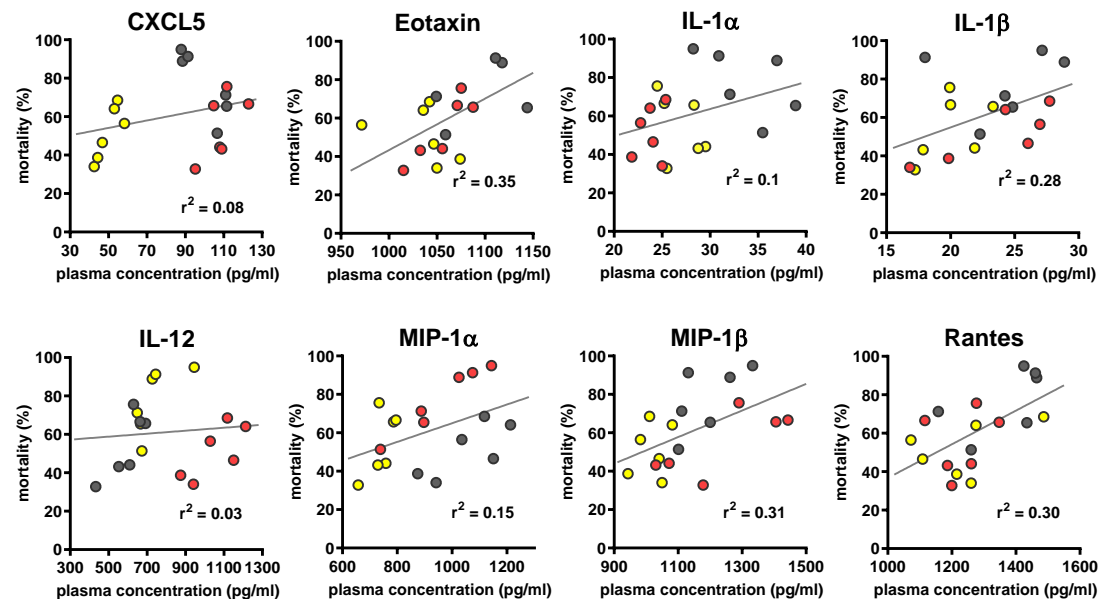

Supplement: supp [file elife-62469-supp-v1.zip]
